# Supplementary material for: Evaluation of an external initiating Ni(ii) diimine catalyst for electron-deficient π-conjugated polymers
Source: Royal Society of Chemistry journal article supplement (doi:10.1039/c7py00873b), 2017-01-01
Supplement: c7py00873b1.pdf [file c7py00873b1.pdf]

# ELECTRONIC SUPPLEMENTARY INFORMATION

## Evaluation of an External Initiating Ni(II) Diimine Catalyst for Electron-Deficient $\pi$ -Conjugated Polymers

*Adam A. Pollit, Nimrat K. Obhi, Alan J. Lough, Dwight S. Seferos\**

Department of Chemistry, University of Toronto, 80 St. George Street,  
Toronto, Ontario, M5S 3H6, Canada

E-mail: dseferos@chem.utoronto.ca

### Table of Contents

|                                                                                                            |     |
|------------------------------------------------------------------------------------------------------------|-----|
| <b>Figure S1.</b> MALDI-ToF spectra of poly(BTz) prepared at 4% and 2% catalyst loading.                   | S2  |
| <b>Figure S2.</b> GPC elution curve and MALDI-ToF spectrum of P3HT prepared at 8% catalyst loading.        | S3  |
| <b>Table S1.</b> Crystal data and structure refinement for Ni(MesAn)OMePhBr.                               | S4  |
| <b>Figure S3.</b> Thermal ellipsoid plot of Ni(MesAn)OMePhBr with atom labels.                             | S6  |
| <b>Table S2.</b> Atomic coordinates and equivalent isotropic displacement parameters for Ni(MesAn)OMePhBr. | S7  |
| <b>Table S3.</b> Bond lengths and angles for Ni(MesAn)OMePhBr.                                             | S10 |
| <b>Table S4.</b> Anisotropic displacement parameters for Ni(MesAn)OMePhBr.                                 | S23 |
| <b>Table S5.</b> Hydrogen coordinates and isotropic displacement parameters for Ni(MesAn)OMePhBr.          | S26 |
| <b>Table S6.</b> Torsion angles for Ni(MesAn)OMePhBr.                                                      | S29 |

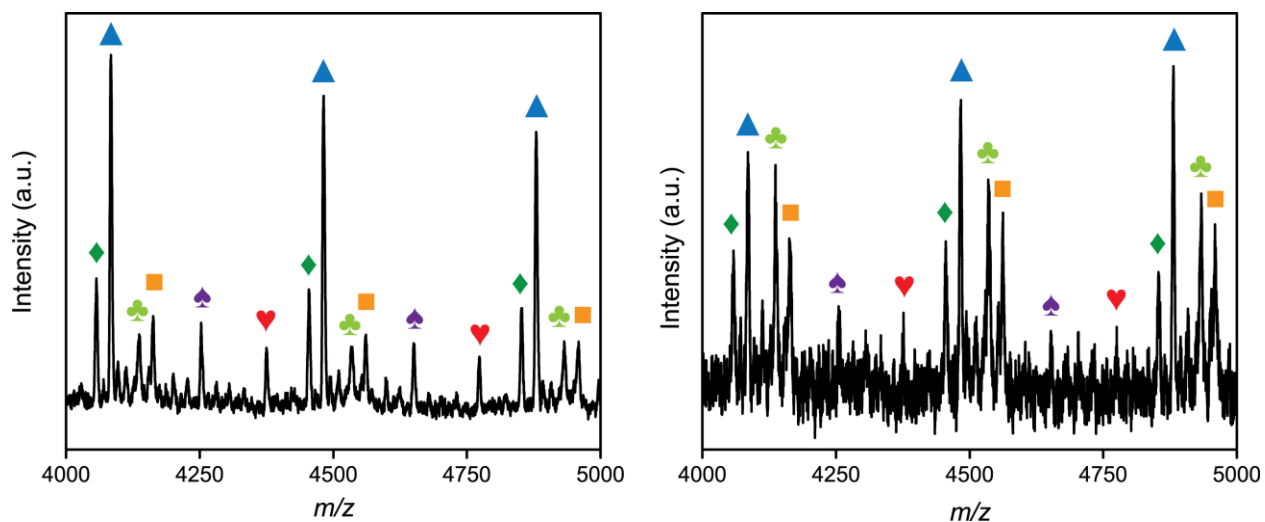

**Figure S1.** MALDI-ToF spectra of poly(BTz) prepared at 4% (left) and 2% (right) catalyst loading. End-group distributions: ▲ = OMePh/H, ■ = OMePh/Br, ◆ = Br/H, ♣ = Br/Br, ♥ = H/H, ♠ = Br/Br - C<sub>20</sub>H<sub>41</sub>.

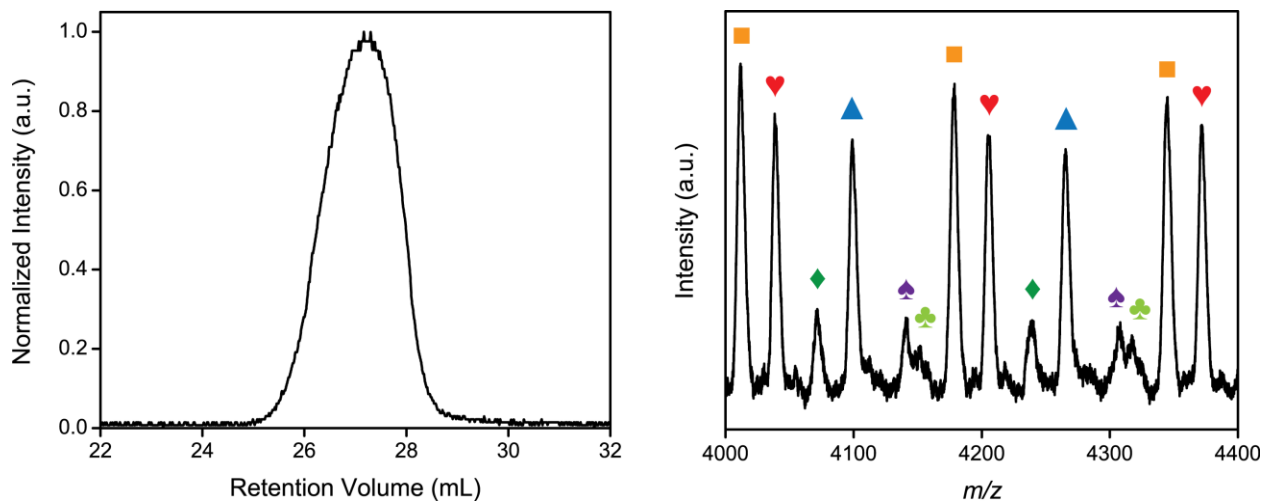

**Figure S2.** Left: GPC elution curve for P3HT prepared at 8% catalyst loading of Ni(MesAn)OMePhBr. Right: MALDI-ToF spectrum of P3HT prepared at 8% catalyst loading. End-group distributions:  $\blacktriangle$  = OMePh/H (21.9%),  $\blacksquare$  = OMePh/Br (30.6%),  $\blacklozenge$  = Br/H (6.9%),  $\clubsuit$  = Br/Br (4.4%),  $\heartsuit$  = OMePh/OMePh (30.2%),  $\spadesuit$  =  $\text{mod}(m/z) = 150$  (5.7%).

**Table S1.** Crystal data and structure refinement for Ni(MesAn)OMePhBr.

|                                 |                                                                                                          |
|---------------------------------|----------------------------------------------------------------------------------------------------------|
| Identification code             | d16139_a                                                                                                 |
| Empirical formula               | C41 H43 Br N2 Ni O2                                                                                      |
| Formula weight                  | 734.39                                                                                                   |
| Temperature                     | 100(2) K                                                                                                 |
| Wavelength                      | 0.71073 Å                                                                                                |
| Crystal system                  | Monoclinic                                                                                               |
| Space group                     | P2 <sub>1</sub> /n                                                                                       |
| Unit cell dimensions            | a = 10.2766(16) Å      a = 90°.<br>b = 16.387(3) Å      b = 92.547(5)°.<br>c = 21.498(3) Å      g = 90°. |
| Volume                          | 3616.7(10) Å <sup>3</sup>                                                                                |
| Z                               | 4                                                                                                        |
| Density (calculated)            | 1.349 Mg/m <sup>3</sup>                                                                                  |
| Absorption coefficient          | 1.678 mm <sup>-1</sup>                                                                                   |
| F(000)                          | 1528                                                                                                     |
| Crystal size                    | 0.120 x 0.040 x 0.040 mm <sup>3</sup>                                                                    |
| Theta range for data collection | 1.563 to 27.519°.                                                                                        |
| Index ranges                    | -13 ≤ h ≤ 13, -21 ≤ k ≤ 21, -27 ≤ l ≤ 24                                                                 |
| Reflections collected           | 56322                                                                                                    |
| Independent reflections         | 8307 [R(int) = 0.1475]                                                                                   |
| Completeness to theta = 25.242° | 100.0 %                                                                                                  |
| Absorption correction           | Semi-empirical from equivalents                                                                          |
| Max. and min. transmission      | 0.7456 and 0.6524                                                                                        |

|                                      |                                       |
|--------------------------------------|---------------------------------------|
| Refinement method                    | Full-matrix least-squares on $F^2$    |
| Data / restraints / parameters       | 8307 / 5 / 441                        |
| Goodness-of-fit on $F^2$             | 0.992                                 |
| Final R indices [ $I > 2\sigma(I)$ ] | R1 = 0.0491, wR2 = 0.1006             |
| R indices (all data)                 | R1 = 0.1391, wR2 = 0.1315             |
| Extinction coefficient               | n/a                                   |
| Largest diff. peak and hole          | 0.897 and -0.561 e. $\text{\AA}^{-3}$ |

---

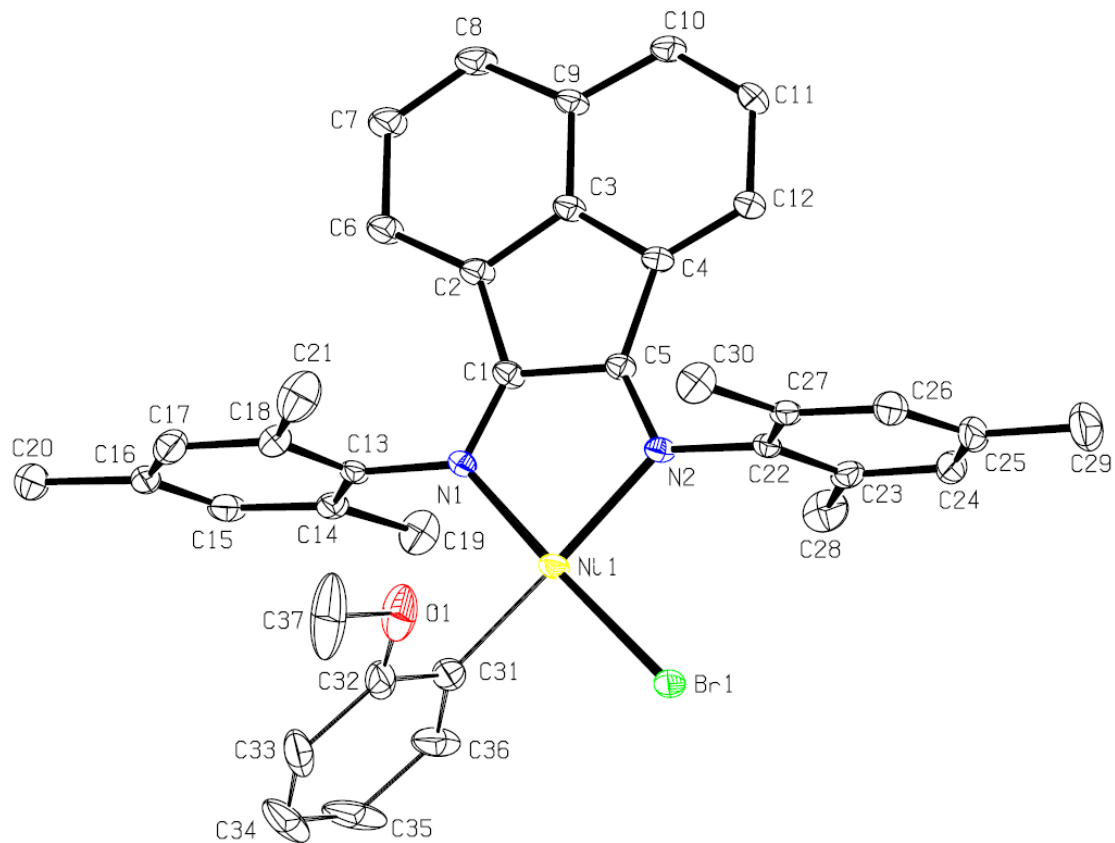

**Figure S3.** Thermal ellipsoid plot of Ni(MesAn)OMePhBr with atom labels. H atoms, solvent of crystallization, and disorder in the *o*-methoxyphenyl ligand are not shown.

**Table S2.** Atomic coordinates ( $\times 10^4$ ) and equivalent isotropic displacement parameters ( $\text{\AA}^2 \times 10^3$ ) for Ni(MesAn)OMePhBr.  $U(\text{eq})$  is defined as one third of the trace of the orthogonalized  $U_{ij}$  tensor.

|       | x        | y       | z       | $U(\text{eq})$ |
|-------|----------|---------|---------|----------------|
| Ni(1) | 8600(1)  | 2112(1) | 7178(1) | 24(1)          |
| Br(1) | 10431(1) | 1531(1) | 7634(1) | 28(1)          |
| N(1)  | 7056(3)  | 2564(2) | 6757(1) | 22(1)          |
| N(2)  | 9114(3)  | 1865(2) | 6311(2) | 22(1)          |
| C(1)  | 7091(4)  | 2508(3) | 6158(2) | 24(1)          |
| C(2)  | 6226(4)  | 2755(3) | 5629(2) | 26(1)          |
| C(3)  | 6874(4)  | 2496(3) | 5091(2) | 25(1)          |
| C(4)  | 8091(4)  | 2110(3) | 5222(2) | 25(1)          |
| C(5)  | 8247(4)  | 2108(2) | 5906(2) | 22(1)          |
| C(6)  | 5061(4)  | 3170(3) | 5560(2) | 34(1)          |
| C(7)  | 4544(4)  | 3302(3) | 4945(2) | 40(1)          |
| C(8)  | 5148(4)  | 3045(3) | 4424(2) | 37(1)          |
| C(9)  | 6365(4)  | 2631(3) | 4481(2) | 27(1)          |
| C(10) | 7150(4)  | 2360(3) | 3998(2) | 31(1)          |
| C(11) | 8337(5)  | 2000(3) | 4126(2) | 33(1)          |
| C(12) | 8829(4)  | 1863(3) | 4742(2) | 30(1)          |
| C(13) | 5927(4)  | 2942(3) | 7004(2) | 23(1)          |
| C(14) | 4867(4)  | 2454(3) | 7137(2) | 27(1)          |
| C(15) | 3757(4)  | 2840(3) | 7347(2) | 36(1)          |
| C(16) | 3691(5)  | 3673(3) | 7431(2) | 36(1)          |

|        |          |         |         |        |
|--------|----------|---------|---------|--------|
| C(17)  | 4768(5)  | 4139(3) | 7295(2) | 40(1)  |
| C(18)  | 5899(4)  | 3786(3) | 7071(2) | 32(1)  |
| C(19)  | 4885(4)  | 1551(3) | 7025(2) | 43(1)  |
| C(20)  | 2468(5)  | 4079(4) | 7654(2) | 57(2)  |
| C(21)  | 7006(5)  | 4319(3) | 6879(3) | 57(2)  |
| C(22)  | 10284(4) | 1501(3) | 6092(2) | 23(1)  |
| C(23)  | 10331(4) | 663(3)  | 6013(2) | 30(1)  |
| C(24)  | 11471(5) | 328(3)  | 5785(2) | 40(1)  |
| C(25)  | 12521(5) | 808(3)  | 5653(2) | 42(1)  |
| C(26)  | 12439(4) | 1634(3) | 5751(2) | 38(1)  |
| C(27)  | 11326(4) | 2003(3) | 5970(2) | 27(1)  |
| C(28)  | 9195(5)  | 128(3)  | 6153(2) | 48(1)  |
| C(29)  | 13754(5) | 438(4)  | 5406(3) | 69(2)  |
| C(30)  | 11243(4) | 2912(3) | 6068(2) | 40(1)  |
| C(31)  | 7971(5)  | 2326(3) | 7986(2) | 33(2)  |
| C(32)  | 8253(5)  | 3087(3) | 8244(2) | 44(2)  |
| C(33)  | 7772(6)  | 3299(4) | 8816(2) | 78(4)  |
| C(34)  | 7009(6)  | 2749(5) | 9131(2) | 95(5)  |
| C(35)  | 6726(5)  | 1988(5) | 8873(2) | 84(4)  |
| C(36)  | 7207(5)  | 1777(3) | 8301(2) | 50(2)  |
| C(37)  | 9326(9)  | 4385(5) | 8171(6) | 106(4) |
| O(1)   | 9047(5)  | 3595(3) | 7917(3) | 56(2)  |
| C(31A) | 8212(14) | 2569(8) | 7965(5) | 16(4)  |
| C(32A) | 8772(13) | 3297(8) | 8173(5) | 26(5)  |



|        |          |          |         |         |
|--------|----------|----------|---------|---------|
| C(33A) | 8428(13) | 3631(6)  | 8736(5) | 40(5)   |
| C(34A) | 7523(13) | 3237(7)  | 9093(5) | 33(5)   |
| C(35A) | 6963(12) | 2509(6)  | 8885(5) | 23(4)   |
| C(36A) | 7307(13) | 2175(6)  | 8322(5) | 16(4)   |
| O(1A)  | 6857(11) | 1433(6)  | 8106(5) | 30(3)   |
| C(37A) | 5854(14) | 1044(10) | 8440(7) | 43(5)   |
| O(1S)  | 1005(17) | 5421(9)  | 5984(8) | 441(14) |
| C(1S)  | 1131(7)  | 5786(4)  | 5353(3) | 78(2)   |
| C(2S)  | 2123(11) | 5376(6)  | 5004(5) | 154(5)  |
| C(3S)  | 2611(10) | 4811(6)  | 5449(6) | 149(5)  |
| C(4S)  | 2397(16) | 5184(6)  | 6040(4) | 181(7)  |

---

**Table S3.** Bond lengths [ $\text{\AA}$ ] and angles [ $^\circ$ ] for Ni(MesAn)OMePhBr.

---

|              |           |
|--------------|-----------|
| Ni(1)-C(31A) | 1.908(8)  |
| Ni(1)-C(31)  | 1.912(3)  |
| Ni(1)-N(1)   | 1.938(3)  |
| Ni(1)-N(2)   | 2.003(3)  |
| Ni(1)-Br(1)  | 2.2899(7) |
| N(1)-C(1)    | 1.292(5)  |
| N(1)-C(13)   | 1.439(5)  |
| N(2)-C(5)    | 1.281(5)  |
| N(2)-C(22)   | 1.439(5)  |
| C(1)-C(2)    | 1.470(5)  |
| C(1)-C(5)    | 1.481(6)  |
| C(2)-C(6)    | 1.379(6)  |
| C(2)-C(3)    | 1.424(6)  |
| C(3)-C(9)    | 1.407(5)  |
| C(3)-C(4)    | 1.418(6)  |
| C(4)-C(12)   | 1.368(6)  |
| C(4)-C(5)    | 1.471(5)  |
| C(6)-C(7)    | 1.420(6)  |
| C(6)-H(6A)   | 0.9500    |
| C(7)-C(8)    | 1.371(6)  |
| C(7)-H(7A)   | 0.9500    |
| C(8)-C(9)    | 1.424(6)  |
| C(8)-H(8A)   | 0.9500    |

|              |          |
|--------------|----------|
| C(9)-C(10)   | 1.413(6) |
| C(10)-C(11)  | 1.372(6) |
| C(10)-H(10A) | 0.9500   |
| C(11)-C(12)  | 1.414(6) |
| C(11)-H(11A) | 0.9500   |
| C(12)-H(12A) | 0.9500   |
| C(13)-C(18)  | 1.390(6) |
| C(13)-C(14)  | 1.391(6) |
| C(14)-C(15)  | 1.396(6) |
| C(14)-C(19)  | 1.499(6) |
| C(15)-C(16)  | 1.379(7) |
| C(15)-H(15A) | 0.9500   |
| C(16)-C(17)  | 1.386(7) |
| C(16)-C(20)  | 1.518(6) |
| C(17)-C(18)  | 1.403(6) |
| C(17)-H(17A) | 0.9500   |
| C(18)-C(21)  | 1.506(7) |
| C(19)-H(19A) | 0.9800   |
| C(19)-H(19B) | 0.9800   |
| C(19)-H(19C) | 0.9800   |
| C(20)-H(20A) | 0.9800   |
| C(20)-H(20B) | 0.9800   |
| C(20)-H(20C) | 0.9800   |
| C(21)-H(21A) | 0.9800   |

|              |          |
|--------------|----------|
| C(21)-H(21B) | 0.9800   |
| C(21)-H(21C) | 0.9800   |
| C(22)-C(27)  | 1.384(6) |
| C(22)-C(23)  | 1.385(6) |
| C(23)-C(24)  | 1.401(6) |
| C(23)-C(28)  | 1.501(6) |
| C(24)-C(25)  | 1.375(7) |
| C(24)-H(24A) | 0.9500   |
| C(25)-C(26)  | 1.373(7) |
| C(25)-C(29)  | 1.522(7) |
| C(26)-C(27)  | 1.394(6) |
| C(26)-H(26A) | 0.9500   |
| C(27)-C(30)  | 1.507(6) |
| C(28)-H(28A) | 0.9800   |
| C(28)-H(28B) | 0.9800   |
| C(28)-H(28C) | 0.9800   |
| C(29)-H(29A) | 0.9800   |
| C(29)-H(29B) | 0.9800   |
| C(29)-H(29C) | 0.9800   |
| C(30)-H(30A) | 0.9800   |
| C(30)-H(30B) | 0.9800   |
| C(30)-H(30C) | 0.9800   |
| C(31)-C(32)  | 1.3900   |
| C(31)-C(36)  | 1.3900   |

|               |          |
|---------------|----------|
| C(32)-O(1)    | 1.379(7) |
| C(32)-C(33)   | 1.3900   |
| C(33)-C(34)   | 1.3900   |
| C(33)-H(33A)  | 0.9500   |
| C(34)-C(35)   | 1.3900   |
| C(34)-H(34A)  | 0.9500   |
| C(35)-C(36)   | 1.3900   |
| C(35)-H(35A)  | 0.9500   |
| C(36)-H(36A)  | 0.9500   |
| C(37)-O(1)    | 1.431(8) |
| C(37)-H(37A)  | 0.9800   |
| C(37)-H(37B)  | 0.9800   |
| C(37)-H(37C)  | 0.9800   |
| C(31A)-C(32A) | 1.3900   |
| C(31A)-C(36A) | 1.3900   |
| C(32A)-C(33A) | 1.3900   |
| C(32A)-H(32A) | 0.9500   |
| C(33A)-C(34A) | 1.3900   |
| C(33A)-H(33B) | 0.9500   |
| C(34A)-C(35A) | 1.3900   |
| C(34A)-H(34B) | 0.9500   |
| C(35A)-C(36A) | 1.3900   |
| C(35A)-H(35B) | 0.9500   |
| C(36A)-O(1A)  | 1.373(9) |

|                    |           |
|--------------------|-----------|
| O(1A)-C(37A)       | 1.432(11) |
| C(37A)-H(37D)      | 0.9800    |
| C(37A)-H(37E)      | 0.9800    |
| C(37A)-H(37F)      | 0.9800    |
| O(1S)-C(4S)        | 1.482(14) |
| O(1S)-C(1S)        | 1.494(13) |
| C(1S)-C(2S)        | 1.458(9)  |
| C(1S)-H(1SA)       | 0.9900    |
| C(1S)-H(1SB)       | 0.9900    |
| C(2S)-C(3S)        | 1.409(12) |
| C(2S)-H(2SA)       | 0.9900    |
| C(2S)-H(2SB)       | 0.9900    |
| C(3S)-C(4S)        | 1.437(9)  |
| C(3S)-H(3SA)       | 0.9900    |
| C(3S)-H(3SB)       | 0.9900    |
| C(4S)-H(4SC)       | 0.9900    |
| C(4S)-H(4SA)       | 0.9900    |
| <hr/>              |           |
| C(31A)-Ni(1)-N(1)  | 93.8(5)   |
| C(31)-Ni(1)-N(1)   | 93.0(2)   |
| C(31A)-Ni(1)-N(2)  | 168.3(4)  |
| C(31)-Ni(1)-N(2)   | 175.5(2)  |
| N(1)-Ni(1)-N(2)    | 83.47(13) |
| C(31A)-Ni(1)-Br(1) | 89.1(5)   |
| C(31)-Ni(1)-Br(1)  | 89.56(18) |

|                  |            |
|------------------|------------|
| N(1)-Ni(1)-Br(1) | 177.02(10) |
| N(2)-Ni(1)-Br(1) | 93.92(10)  |
| C(1)-N(1)-C(13)  | 117.2(3)   |
| C(1)-N(1)-Ni(1)  | 112.3(3)   |
| C(13)-N(1)-Ni(1) | 130.4(2)   |
| C(5)-N(2)-C(22)  | 118.2(3)   |
| C(5)-N(2)-Ni(1)  | 111.4(3)   |
| C(22)-N(2)-Ni(1) | 130.3(2)   |
| N(1)-C(1)-C(2)   | 135.2(4)   |
| N(1)-C(1)-C(5)   | 117.1(3)   |
| C(2)-C(1)-C(5)   | 107.7(3)   |
| C(6)-C(2)-C(3)   | 119.7(4)   |
| C(6)-C(2)-C(1)   | 135.3(4)   |
| C(3)-C(2)-C(1)   | 105.0(3)   |
| C(9)-C(3)-C(4)   | 122.9(4)   |
| C(9)-C(3)-C(2)   | 122.8(4)   |
| C(4)-C(3)-C(2)   | 114.3(3)   |
| C(12)-C(4)-C(3)  | 119.7(4)   |
| C(12)-C(4)-C(5)  | 135.5(4)   |
| C(3)-C(4)-C(5)   | 104.8(3)   |
| N(2)-C(5)-C(4)   | 136.1(4)   |
| N(2)-C(5)-C(1)   | 115.7(3)   |
| C(4)-C(5)-C(1)   | 108.2(3)   |
| C(2)-C(6)-C(7)   | 117.5(4)   |

|                    |          |
|--------------------|----------|
| C(2)-C(6)-H(6A)    | 121.2    |
| C(7)-C(6)-H(6A)    | 121.2    |
| C(8)-C(7)-C(6)     | 123.3(4) |
| C(8)-C(7)-H(7A)    | 118.3    |
| C(6)-C(7)-H(7A)    | 118.3    |
| C(7)-C(8)-C(9)     | 120.3(4) |
| C(7)-C(8)-H(8A)    | 119.8    |
| C(9)-C(8)-H(8A)    | 119.8    |
| C(3)-C(9)-C(10)    | 115.8(4) |
| C(3)-C(9)-C(8)     | 116.3(4) |
| C(10)-C(9)-C(8)    | 127.9(4) |
| C(11)-C(10)-C(9)   | 121.3(4) |
| C(11)-C(10)-H(10A) | 119.4    |
| C(9)-C(10)-H(10A)  | 119.4    |
| C(10)-C(11)-C(12)  | 122.2(4) |
| C(10)-C(11)-H(11A) | 118.9    |
| C(12)-C(11)-H(11A) | 118.9    |
| C(4)-C(12)-C(11)   | 118.2(4) |
| C(4)-C(12)-H(12A)  | 120.9    |
| C(11)-C(12)-H(12A) | 120.9    |
| C(18)-C(13)-C(14)  | 122.1(4) |
| C(18)-C(13)-N(1)   | 119.1(4) |
| C(14)-C(13)-N(1)   | 118.7(4) |
| C(13)-C(14)-C(15)  | 117.6(4) |



|                     |          |
|---------------------|----------|
| C(13)-C(14)-C(19)   | 121.3(4) |
| C(15)-C(14)-C(19)   | 121.0(4) |
| C(16)-C(15)-C(14)   | 122.5(4) |
| C(16)-C(15)-H(15A)  | 118.8    |
| C(14)-C(15)-H(15A)  | 118.8    |
| C(15)-C(16)-C(17)   | 118.2(4) |
| C(15)-C(16)-C(20)   | 121.5(5) |
| C(17)-C(16)-C(20)   | 120.3(5) |
| C(16)-C(17)-C(18)   | 121.8(4) |
| C(16)-C(17)-H(17A)  | 119.1    |
| C(18)-C(17)-H(17A)  | 119.1    |
| C(13)-C(18)-C(17)   | 117.8(4) |
| C(13)-C(18)-C(21)   | 122.0(4) |
| C(17)-C(18)-C(21)   | 120.1(4) |
| C(14)-C(19)-H(19A)  | 109.5    |
| C(14)-C(19)-H(19B)  | 109.5    |
| H(19A)-C(19)-H(19B) | 109.5    |
| C(14)-C(19)-H(19C)  | 109.5    |
| H(19A)-C(19)-H(19C) | 109.5    |
| H(19B)-C(19)-H(19C) | 109.5    |
| C(16)-C(20)-H(20A)  | 109.5    |
| C(16)-C(20)-H(20B)  | 109.5    |
| H(20A)-C(20)-H(20B) | 109.5    |
| C(16)-C(20)-H(20C)  | 109.5    |

|                     |          |
|---------------------|----------|
| H(20A)-C(20)-H(20C) | 109.5    |
| H(20B)-C(20)-H(20C) | 109.5    |
| C(18)-C(21)-H(21A)  | 109.5    |
| C(18)-C(21)-H(21B)  | 109.5    |
| H(21A)-C(21)-H(21B) | 109.5    |
| C(18)-C(21)-H(21C)  | 109.5    |
| H(21A)-C(21)-H(21C) | 109.5    |
| H(21B)-C(21)-H(21C) | 109.5    |
| C(27)-C(22)-C(23)   | 122.3(4) |
| C(27)-C(22)-N(2)    | 118.7(4) |
| C(23)-C(22)-N(2)    | 119.0(4) |
| C(22)-C(23)-C(24)   | 117.7(4) |
| C(22)-C(23)-C(28)   | 121.5(4) |
| C(24)-C(23)-C(28)   | 120.7(4) |
| C(25)-C(24)-C(23)   | 121.6(5) |
| C(25)-C(24)-H(24A)  | 119.2    |
| C(23)-C(24)-H(24A)  | 119.2    |
| C(26)-C(25)-C(24)   | 118.5(4) |
| C(26)-C(25)-C(29)   | 120.3(5) |
| C(24)-C(25)-C(29)   | 121.2(5) |
| C(25)-C(26)-C(27)   | 122.4(5) |
| C(25)-C(26)-H(26A)  | 118.8    |
| C(27)-C(26)-H(26A)  | 118.8    |
| C(22)-C(27)-C(26)   | 117.4(4) |

|                     |          |
|---------------------|----------|
| C(22)-C(27)-C(30)   | 120.8(4) |
| C(26)-C(27)-C(30)   | 121.8(4) |
| C(23)-C(28)-H(28A)  | 109.5    |
| C(23)-C(28)-H(28B)  | 109.5    |
| H(28A)-C(28)-H(28B) | 109.5    |
| C(23)-C(28)-H(28C)  | 109.5    |
| H(28A)-C(28)-H(28C) | 109.5    |
| H(28B)-C(28)-H(28C) | 109.5    |
| C(25)-C(29)-H(29A)  | 109.5    |
| C(25)-C(29)-H(29B)  | 109.5    |
| H(29A)-C(29)-H(29B) | 109.5    |
| C(25)-C(29)-H(29C)  | 109.5    |
| H(29A)-C(29)-H(29C) | 109.5    |
| H(29B)-C(29)-H(29C) | 109.5    |
| C(27)-C(30)-H(30A)  | 109.5    |
| C(27)-C(30)-H(30B)  | 109.5    |
| H(30A)-C(30)-H(30B) | 109.5    |
| C(27)-C(30)-H(30C)  | 109.5    |
| H(30A)-C(30)-H(30C) | 109.5    |
| H(30B)-C(30)-H(30C) | 109.5    |
| C(32)-C(31)-C(36)   | 120.0    |
| C(32)-C(31)-Ni(1)   | 117.0(3) |
| C(36)-C(31)-Ni(1)   | 122.9(3) |
| O(1)-C(32)-C(31)    | 117.1(4) |

|                      |          |
|----------------------|----------|
| O(1)-C(32)-C(33)     | 122.9(4) |
| C(31)-C(32)-C(33)    | 120.0    |
| C(34)-C(33)-C(32)    | 120.0    |
| C(34)-C(33)-H(33A)   | 120.0    |
| C(32)-C(33)-H(33A)   | 120.0    |
| C(33)-C(34)-C(35)    | 120.0    |
| C(33)-C(34)-H(34A)   | 120.0    |
| C(35)-C(34)-H(34A)   | 120.0    |
| C(36)-C(35)-C(34)    | 120.0    |
| C(36)-C(35)-H(35A)   | 120.0    |
| C(34)-C(35)-H(35A)   | 120.0    |
| C(35)-C(36)-C(31)    | 120.0    |
| C(35)-C(36)-H(36A)   | 120.0    |
| C(31)-C(36)-H(36A)   | 120.0    |
| O(1)-C(37)-H(37A)    | 109.5    |
| O(1)-C(37)-H(37B)    | 109.5    |
| H(37A)-C(37)-H(37B)  | 109.5    |
| O(1)-C(37)-H(37C)    | 109.5    |
| H(37A)-C(37)-H(37C)  | 109.5    |
| H(37B)-C(37)-H(37C)  | 109.5    |
| C(32)-O(1)-C(37)     | 117.6(7) |
| C(32A)-C(31A)-C(36A) | 120.0    |
| C(32A)-C(31A)-Ni(1)  | 121.4(6) |
| C(36A)-C(31A)-Ni(1)  | 118.5(6) |

C(33A)-C(32A)-C(31A) 120.0  
C(33A)-C(32A)-H(32A) 120.0  
C(31A)-C(32A)-H(32A) 120.0  
C(34A)-C(33A)-C(32A) 120.0  
C(34A)-C(33A)-H(33B) 120.0  
C(32A)-C(33A)-H(33B) 120.0  
C(33A)-C(34A)-C(35A) 120.0  
C(33A)-C(34A)-H(34B) 120.0  
C(35A)-C(34A)-H(34B) 120.0  
C(34A)-C(35A)-C(36A) 120.0  
C(34A)-C(35A)-H(35B) 120.0  
C(36A)-C(35A)-H(35B) 120.0  
O(1A)-C(36A)-C(35A) 123.2(9)  
O(1A)-C(36A)-C(31A) 116.7(9)  
C(35A)-C(36A)-C(31A) 120.0  
C(36A)-O(1A)-C(37A) 117.7(12)  
O(1A)-C(37A)-H(37D) 109.5  
O(1A)-C(37A)-H(37E) 109.5  
H(37D)-C(37A)-H(37E) 109.5  
O(1A)-C(37A)-H(37F) 109.5  
H(37D)-C(37A)-H(37F) 109.5  
H(37E)-C(37A)-H(37F) 109.5  
C(4S)-O(1S)-C(1S) 93.2(11)  
C(2S)-C(1S)-O(1S) 112.0(9)

|                     |          |
|---------------------|----------|
| C(2S)-C(1S)-H(1SA)  | 109.2    |
| O(1S)-C(1S)-H(1SA)  | 109.2    |
| C(2S)-C(1S)-H(1SB)  | 109.2    |
| O(1S)-C(1S)-H(1SB)  | 109.2    |
| H(1SA)-C(1S)-H(1SB) | 107.9    |
| C(3S)-C(2S)-C(1S)   | 100.9(7) |
| C(3S)-C(2S)-H(2SA)  | 111.6    |
| C(1S)-C(2S)-H(2SA)  | 111.6    |
| C(3S)-C(2S)-H(2SB)  | 111.6    |
| C(1S)-C(2S)-H(2SB)  | 111.6    |
| H(2SA)-C(2S)-H(2SB) | 109.4    |
| C(2S)-C(3S)-C(4S)   | 104.9(8) |
| C(2S)-C(3S)-H(3SA)  | 110.8    |
| C(4S)-C(3S)-H(3SA)  | 110.8    |
| C(2S)-C(3S)-H(3SB)  | 110.8    |
| C(4S)-C(3S)-H(3SB)  | 110.8    |
| H(3SA)-C(3S)-H(3SB) | 108.8    |
| C(3S)-C(4S)-O(1S)   | 103.0(9) |
| C(3S)-C(4S)-H(4SC)  | 111.2    |
| O(1S)-C(4S)-H(4SC)  | 111.2    |
| C(3S)-C(4S)-H(4SA)  | 111.2    |
| O(1S)-C(4S)-H(4SA)  | 111.2    |
| H(4SC)-C(4S)-H(4SA) | 109.1    |

---

Symmetry transformations used to generate equivalent atoms:

**Table S4.** Anisotropic displacement parameters ( $\text{\AA}^2 \times 10^3$ ) for Ni(MesAn)OMePhBr. The anisotropic displacement factor exponent takes the form:  $-2p^2 [h^2 a^{*2} U^{11} + \dots + 2 h k a^* b^* U^{12}]$

|       | U11   | U22   | U33   | U23   | U13    | U12   |
|-------|-------|-------|-------|-------|--------|-------|
| Ni(1) | 23(1) | 34(1) | 15(1) | 0(1)  | -2(1)  | 2(1)  |
| Br(1) | 28(1) | 36(1) | 20(1) | -2(1) | -5(1)  | 5(1)  |
| N(1)  | 24(2) | 24(2) | 17(2) | 1(1)  | 4(2)   | -1(2) |
| N(2)  | 19(2) | 28(2) | 18(2) | 3(2)  | 0(2)   | -3(2) |
| C(1)  | 20(2) | 33(3) | 19(2) | -2(2) | 0(2)   | -4(2) |
| C(2)  | 17(2) | 42(3) | 20(2) | 3(2)  | -2(2)  | -4(2) |
| C(3)  | 25(2) | 33(2) | 18(2) | 0(2)  | -1(2)  | -2(2) |
| C(4)  | 27(2) | 29(2) | 17(2) | 0(2)  | -3(2)  | -1(2) |
| C(5)  | 22(2) | 27(2) | 18(2) | -1(2) | -2(2)  | -2(2) |
| C(6)  | 22(3) | 56(3) | 23(2) | 5(2)  | 1(2)   | 2(2)  |
| C(7)  | 25(3) | 70(4) | 26(3) | 6(2)  | -5(2)  | 11(2) |
| C(8)  | 31(3) | 55(3) | 23(2) | 4(2)  | -12(2) | -2(2) |
| C(9)  | 28(3) | 36(3) | 16(2) | 0(2)  | -2(2)  | -2(2) |
| C(10) | 38(3) | 37(3) | 19(2) | 1(2)  | -7(2)  | 4(2)  |
| C(11) | 44(3) | 37(3) | 20(2) | -6(2) | 4(2)   | 6(2)  |
| C(12) | 37(3) | 34(3) | 20(2) | -1(2) | -1(2)  | 6(2)  |
| C(13) | 19(2) | 37(3) | 13(2) | 1(2)  | -1(2)  | 5(2)  |
| C(14) | 20(2) | 40(3) | 20(2) | 2(2)  | -6(2)  | 4(2)  |
| C(15) | 25(3) | 58(4) | 24(2) | 12(2) | 1(2)   | 3(2)  |
| C(16) | 33(3) | 55(4) | 21(2) | 2(2)  | -2(2)  | 21(2) |

|       |         |         |         |         |         |         |
|-------|---------|---------|---------|---------|---------|---------|
| C(17) | 52(3)   | 33(3)   | 35(3)   | -4(2)   | -9(2)   | 13(2)   |
| C(18) | 31(3)   | 34(3)   | 32(3)   | 3(2)    | -2(2)   | 6(2)    |
| C(19) | 29(3)   | 39(3)   | 61(3)   | 3(3)    | 2(2)    | -7(2)   |
| C(20) | 47(3)   | 87(5)   | 38(3)   | 8(3)    | 6(3)    | 37(3)   |
| C(21) | 51(4)   | 36(3)   | 84(4)   | 3(3)    | 0(3)    | -3(3)   |
| C(22) | 23(2)   | 30(2)   | 15(2)   | 1(2)    | 0(2)    | 3(2)    |
| C(23) | 35(3)   | 29(3)   | 23(2)   | 1(2)    | -8(2)   | 4(2)    |
| C(24) | 55(4)   | 38(3)   | 25(2)   | -10(2)  | -9(2)   | 19(3)   |
| C(25) | 35(3)   | 63(4)   | 29(3)   | -5(2)   | -1(2)   | 23(3)   |
| C(26) | 23(3)   | 59(4)   | 33(3)   | 6(2)    | 4(2)    | 9(2)    |
| C(27) | 26(3)   | 36(3)   | 19(2)   | 5(2)    | -1(2)   | 4(2)    |
| C(28) | 60(4)   | 30(3)   | 53(3)   | -2(2)   | -8(3)   | -9(3)   |
| C(29) | 55(4)   | 103(5)  | 50(4)   | -18(3)  | 2(3)    | 40(4)   |
| C(30) | 31(3)   | 37(3)   | 53(3)   | 5(2)    | 3(2)    | -6(2)   |
| C(31) | 26(4)   | 45(5)   | 27(4)   | -2(3)   | -4(3)   | 6(4)    |
| C(32) | 33(5)   | 64(6)   | 33(4)   | -12(4)  | -8(4)   | 23(4)   |
| C(33) | 63(7)   | 131(10) | 36(5)   | -34(5)  | -16(5)  | 65(7)   |
| C(34) | 45(6)   | 220(16) | 20(5)   | -18(7)  | -9(4)   | 62(8)   |
| C(35) | 22(4)   | 201(14) | 27(5)   | 37(6)   | -5(4)   | 9(6)    |
| C(36) | 27(5)   | 92(9)   | 30(5)   | 22(5)   | 0(4)    | 2(5)    |
| C(37) | 71(7)   | 60(7)   | 186(12) | -71(7)  | 1(7)    | 13(5)   |
| O(1)  | 52(3)   | 34(3)   | 81(4)   | -29(3)  | -10(3)  | 5(3)    |
| O(1S) | 450(20) | 303(17) | 590(30) | 226(19) | 210(20) | 159(17) |
| C(1S) | 76(5)   | 68(5)   | 88(5)   | 11(4)   | -15(4)  | -26(4)  |



|       |         |        |         |        |        |          |
|-------|---------|--------|---------|--------|--------|----------|
| C(2S) | 209(12) | 131(9) | 128(9)  | -59(8) | 82(9)  | -71(9)   |
| C(3S) | 134(9)  | 97(8)  | 224(14) | 62(9)  | 89(9)  | 44(7)    |
| C(4S) | 370(20) | 96(8)  | 73(6)   | -10(5) | -51(9) | -105(11) |

---

**Table S5.** Hydrogen coordinates ( $\times 10^4$ ) and isotropic displacement parameters ( $\text{\AA}^2 \times 10^3$ ) for Ni(MesAn)OMePhBr.

|        | x     | y    | z    | U(eq) |
|--------|-------|------|------|-------|
| H(6A)  | 4621  | 3359 | 5912 | 41    |
| H(7A)  | 3738  | 3583 | 4892 | 48    |
| H(8A)  | 4754  | 3145 | 4023 | 44    |
| H(10A) | 6850  | 2430 | 3577 | 38    |
| H(11A) | 8845  | 1836 | 3790 | 40    |
| H(12A) | 9649  | 1608 | 4821 | 36    |
| H(15A) | 3020  | 2517 | 7434 | 43    |
| H(17A) | 4739  | 4713 | 7355 | 48    |
| H(19A) | 4149  | 1297 | 7226 | 64    |
| H(19B) | 5703  | 1322 | 7200 | 64    |
| H(19C) | 4816  | 1444 | 6576 | 64    |
| H(20A) | 1742  | 3692 | 7625 | 86    |
| H(20B) | 2259  | 4557 | 7394 | 86    |
| H(20C) | 2615  | 4252 | 8088 | 86    |
| H(21A) | 6907  | 4867 | 7054 | 86    |
| H(21B) | 6998  | 4354 | 6424 | 86    |
| H(21C) | 7835  | 4083 | 7035 | 86    |
| H(24A) | 11519 | -244 | 5721 | 48    |
| H(26A) | 13167 | 1967 | 5666 | 46    |
| H(28A) | 9470  | -444 | 6154 | 72    |
| H(28B) | 8496  | 209  | 5833 | 72    |

|        |       |      |      |     |
|--------|-------|------|------|-----|
| H(28C) | 8877  | 272  | 6562 | 72  |
| H(29A) | 13551 | -95  | 5219 | 104 |
| H(29B) | 14406 | 370  | 5749 | 104 |
| H(29C) | 14100 | 800  | 5090 | 104 |
| H(30A) | 12094 | 3160 | 6003 | 60  |
| H(30B) | 10987 | 3024 | 6493 | 60  |
| H(30C) | 10593 | 3144 | 5770 | 60  |
| H(33A) | 7966  | 3819 | 8992 | 93  |
| H(34A) | 6680  | 2893 | 9522 | 115 |
| H(35A) | 6204  | 1612 | 9088 | 101 |
| H(36A) | 7014  | 1257 | 8125 | 60  |
| H(37A) | 9930  | 4672 | 7907 | 159 |
| H(37B) | 9724  | 4327 | 8592 | 159 |
| H(37C) | 8517  | 4698 | 8190 | 159 |
| H(32A) | 9391  | 3567 | 7929 | 31  |
| H(33B) | 8811  | 4129 | 8878 | 48  |
| H(34B) | 7288  | 3465 | 9478 | 39  |
| H(35B) | 6345  | 2239 | 9129 | 28  |
| H(37D) | 5584  | 541  | 8225 | 65  |
| H(37E) | 5105  | 1412 | 8461 | 65  |
| H(37F) | 6186  | 913  | 8863 | 65  |
| H(1SA) | 283   | 5750 | 5118 | 93  |
| H(1SB) | 1359  | 6371 | 5398 | 93  |
| H(2SA) | 1740  | 5099 | 4629 | 184 |

|        |      |      |      |     |
|--------|------|------|------|-----|
| H(2SB) | 2807 | 5760 | 4878 | 184 |
| H(3SA) | 3551 | 4711 | 5399 | 179 |
| H(3SB) | 2140 | 4285 | 5409 | 179 |
| H(4SC) | 2962 | 5668 | 6109 | 218 |
| H(4SA) | 2560 | 4794 | 6386 | 218 |

---

**Table S6.** Torsion angles [°] for Ni(MesAn)OMePhBr.

---

|                      |           |
|----------------------|-----------|
| C(13)-N(1)-C(1)-C(2) | 1.0(7)    |
| Ni(1)-N(1)-C(1)-C(2) | -178.7(4) |
| C(13)-N(1)-C(1)-C(5) | -179.2(3) |
| Ni(1)-N(1)-C(1)-C(5) | 1.1(5)    |
| N(1)-C(1)-C(2)-C(6)  | 2.8(9)    |
| C(5)-C(1)-C(2)-C(6)  | -177.0(5) |
| N(1)-C(1)-C(2)-C(3)  | -179.8(5) |
| C(5)-C(1)-C(2)-C(3)  | 0.4(4)    |
| C(6)-C(2)-C(3)-C(9)  | -1.2(6)   |
| C(1)-C(2)-C(3)-C(9)  | -179.1(4) |
| C(6)-C(2)-C(3)-C(4)  | 177.2(4)  |
| C(1)-C(2)-C(3)-C(4)  | -0.7(5)   |
| C(9)-C(3)-C(4)-C(12) | 1.0(6)    |
| C(2)-C(3)-C(4)-C(12) | -177.4(4) |
| C(9)-C(3)-C(4)-C(5)  | 179.1(4)  |
| C(2)-C(3)-C(4)-C(5)  | 0.7(5)    |
| C(22)-N(2)-C(5)-C(4) | 1.0(7)    |
| Ni(1)-N(2)-C(5)-C(4) | 178.7(4)  |
| C(22)-N(2)-C(5)-C(1) | -177.5(3) |
| Ni(1)-N(2)-C(5)-C(1) | 0.2(4)    |
| C(12)-C(4)-C(5)-N(2) | -1.3(9)   |
| C(3)-C(4)-C(5)-N(2)  | -179.0(5) |
| C(12)-C(4)-C(5)-C(1) | 177.3(5)  |

|                        |           |
|------------------------|-----------|
| C(3)-C(4)-C(5)-C(1)    | -0.4(5)   |
| N(1)-C(1)-C(5)-N(2)    | -0.9(6)   |
| C(2)-C(1)-C(5)-N(2)    | 179.0(4)  |
| N(1)-C(1)-C(5)-C(4)    | -179.9(4) |
| C(2)-C(1)-C(5)-C(4)    | 0.0(5)    |
| C(3)-C(2)-C(6)-C(7)    | 1.4(6)    |
| C(1)-C(2)-C(6)-C(7)    | 178.6(5)  |
| C(2)-C(6)-C(7)-C(8)    | -0.5(7)   |
| C(6)-C(7)-C(8)-C(9)    | -0.7(8)   |
| C(4)-C(3)-C(9)-C(10)   | -0.4(6)   |
| C(2)-C(3)-C(9)-C(10)   | 177.9(4)  |
| C(4)-C(3)-C(9)-C(8)    | -178.3(4) |
| C(2)-C(3)-C(9)-C(8)    | -0.1(6)   |
| C(7)-C(8)-C(9)-C(3)    | 1.0(7)    |
| C(7)-C(8)-C(9)-C(10)   | -176.7(5) |
| C(3)-C(9)-C(10)-C(11)  | -0.7(6)   |
| C(8)-C(9)-C(10)-C(11)  | 176.9(5)  |
| C(9)-C(10)-C(11)-C(12) | 1.3(7)    |
| C(3)-C(4)-C(12)-C(11)  | -0.5(6)   |
| C(5)-C(4)-C(12)-C(11)  | -177.9(5) |
| C(10)-C(11)-C(12)-C(4) | -0.6(7)   |
| C(1)-N(1)-C(13)-C(18)  | -86.5(5)  |
| Ni(1)-N(1)-C(13)-C(18) | 93.2(4)   |
| C(1)-N(1)-C(13)-C(14)  | 90.0(5)   |

|                         |           |
|-------------------------|-----------|
| Ni(1)-N(1)-C(13)-C(14)  | -90.4(4)  |
| C(18)-C(13)-C(14)-C(15) | -0.4(6)   |
| N(1)-C(13)-C(14)-C(15)  | -176.8(3) |
| C(18)-C(13)-C(14)-C(19) | 176.2(4)  |
| N(1)-C(13)-C(14)-C(19)  | -0.1(6)   |
| C(13)-C(14)-C(15)-C(16) | -0.8(6)   |
| C(19)-C(14)-C(15)-C(16) | -177.5(4) |
| C(14)-C(15)-C(16)-C(17) | 0.8(6)    |
| C(14)-C(15)-C(16)-C(20) | 179.5(4)  |
| C(15)-C(16)-C(17)-C(18) | 0.6(6)    |
| C(20)-C(16)-C(17)-C(18) | -178.1(4) |
| C(14)-C(13)-C(18)-C(17) | 1.7(6)    |
| N(1)-C(13)-C(18)-C(17)  | 178.0(3)  |
| C(14)-C(13)-C(18)-C(21) | -175.1(4) |
| N(1)-C(13)-C(18)-C(21)  | 1.2(6)    |
| C(16)-C(17)-C(18)-C(13) | -1.8(6)   |
| C(16)-C(17)-C(18)-C(21) | 175.1(4)  |
| C(5)-N(2)-C(22)-C(27)   | 88.5(5)   |
| Ni(1)-N(2)-C(22)-C(27)  | -88.6(4)  |
| C(5)-N(2)-C(22)-C(23)   | -91.6(5)  |
| Ni(1)-N(2)-C(22)-C(23)  | 91.2(4)   |
| C(27)-C(22)-C(23)-C(24) | -1.6(6)   |
| N(2)-C(22)-C(23)-C(24)  | 178.5(3)  |
| C(27)-C(22)-C(23)-C(28) | 179.5(4)  |

|                         |           |
|-------------------------|-----------|
| N(2)-C(22)-C(23)-C(28)  | -0.4(6)   |
| C(22)-C(23)-C(24)-C(25) | 1.0(6)    |
| C(28)-C(23)-C(24)-C(25) | 179.9(4)  |
| C(23)-C(24)-C(25)-C(26) | 0.2(7)    |
| C(23)-C(24)-C(25)-C(29) | -179.9(4) |
| C(24)-C(25)-C(26)-C(27) | -0.9(7)   |
| C(29)-C(25)-C(26)-C(27) | 179.2(4)  |
| C(23)-C(22)-C(27)-C(26) | 1.0(6)    |
| N(2)-C(22)-C(27)-C(26)  | -179.1(3) |
| C(23)-C(22)-C(27)-C(30) | -179.5(4) |
| N(2)-C(22)-C(27)-C(30)  | 0.4(6)    |
| C(25)-C(26)-C(27)-C(22) | 0.3(6)    |
| C(25)-C(26)-C(27)-C(30) | -179.2(4) |
| C(36)-C(31)-C(32)-O(1)  | 178.2(5)  |
| Ni(1)-C(31)-C(32)-O(1)  | -5.0(4)   |
| C(36)-C(31)-C(32)-C(33) | 0.0       |
| Ni(1)-C(31)-C(32)-C(33) | 176.9(4)  |
| O(1)-C(32)-C(33)-C(34)  | -178.0(5) |
| C(31)-C(32)-C(33)-C(34) | 0.0       |
| C(32)-C(33)-C(34)-C(35) | 0.0       |
| C(33)-C(34)-C(35)-C(36) | 0.0       |
| C(34)-C(35)-C(36)-C(31) | 0.0       |
| C(32)-C(31)-C(36)-C(35) | 0.0       |
| Ni(1)-C(31)-C(36)-C(35) | -176.7(4) |



|                             |            |
|-----------------------------|------------|
| C(31)-C(32)-O(1)-C(37)      | 178.9(6)   |
| C(33)-C(32)-O(1)-C(37)      | -3.0(8)    |
| C(36A)-C(31A)-C(32A)-C(33A) | 0.0        |
| Ni(1)-C(31A)-C(32A)-C(33A)  | 177.3(11)  |
| C(31A)-C(32A)-C(33A)-C(34A) | 0.0        |
| C(32A)-C(33A)-C(34A)-C(35A) | 0.0        |
| C(33A)-C(34A)-C(35A)-C(36A) | 0.0        |
| C(34A)-C(35A)-C(36A)-O(1A)  | 175.7(14)  |
| C(34A)-C(35A)-C(36A)-C(31A) | 0.0        |
| C(32A)-C(31A)-C(36A)-O(1A)  | -176.0(13) |
| Ni(1)-C(31A)-C(36A)-O(1A)   | 6.6(12)    |
| C(32A)-C(31A)-C(36A)-C(35A) | 0.0        |
| Ni(1)-C(31A)-C(36A)-C(35A)  | -177.4(11) |
| C(35A)-C(36A)-O(1A)-C(37A)  | 8.7(18)    |
| C(31A)-C(36A)-O(1A)-C(37A)  | -175.5(11) |
| C(4S)-O(1S)-C(1S)-C(2S)     | 30.9(13)   |
| O(1S)-C(1S)-C(2S)-C(3S)     | -3.3(14)   |
| C(1S)-C(2S)-C(3S)-C(4S)     | -27.8(12)  |
| C(2S)-C(3S)-C(4S)-O(1S)     | 50.6(12)   |
| C(1S)-O(1S)-C(4S)-C(3S)     | -46.7(12)  |

---

Symmetry transformations used to generate equivalent atoms:
